# Supplementary material
Source: publisher site journal article supplement (https://www.dovepress.com/article/604112)
Supplement: Supplementary file 1 [file 604112%20Supplementary%20Material.docx]

**Supplementary Material**


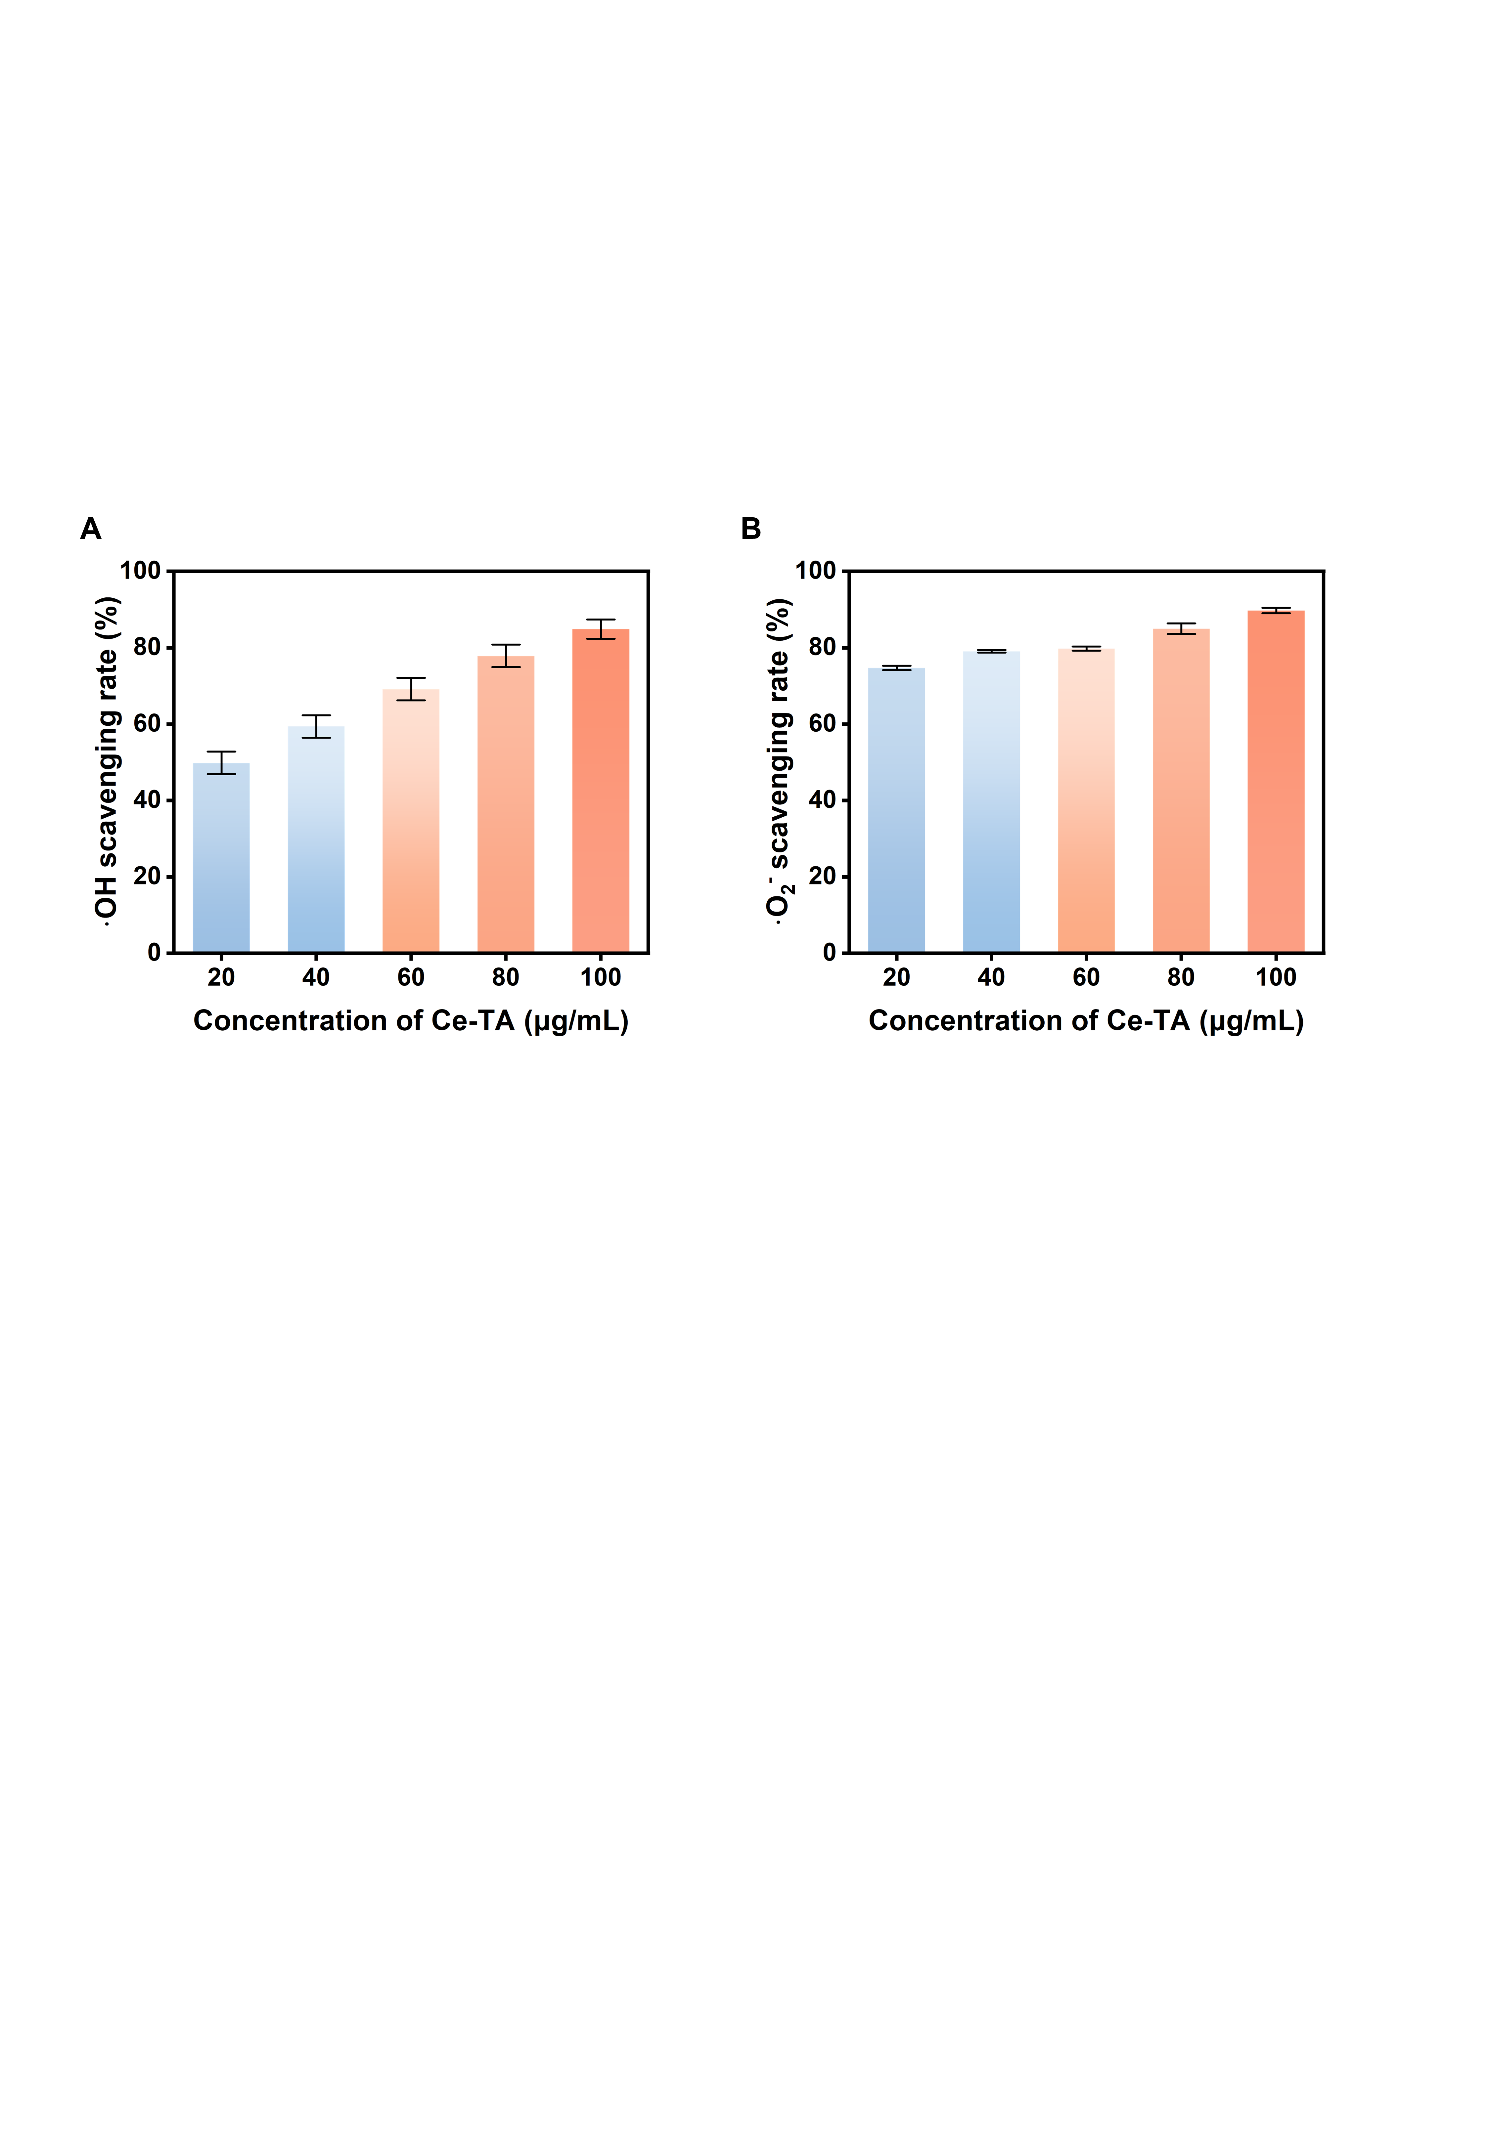


**Figure S1.** The(A) 🞄OH and (B) 🞄O2- free radical scavenging abilities of Ce-TA at different concentrations. Data are presented as means ± SD (n = 3 per group).

**
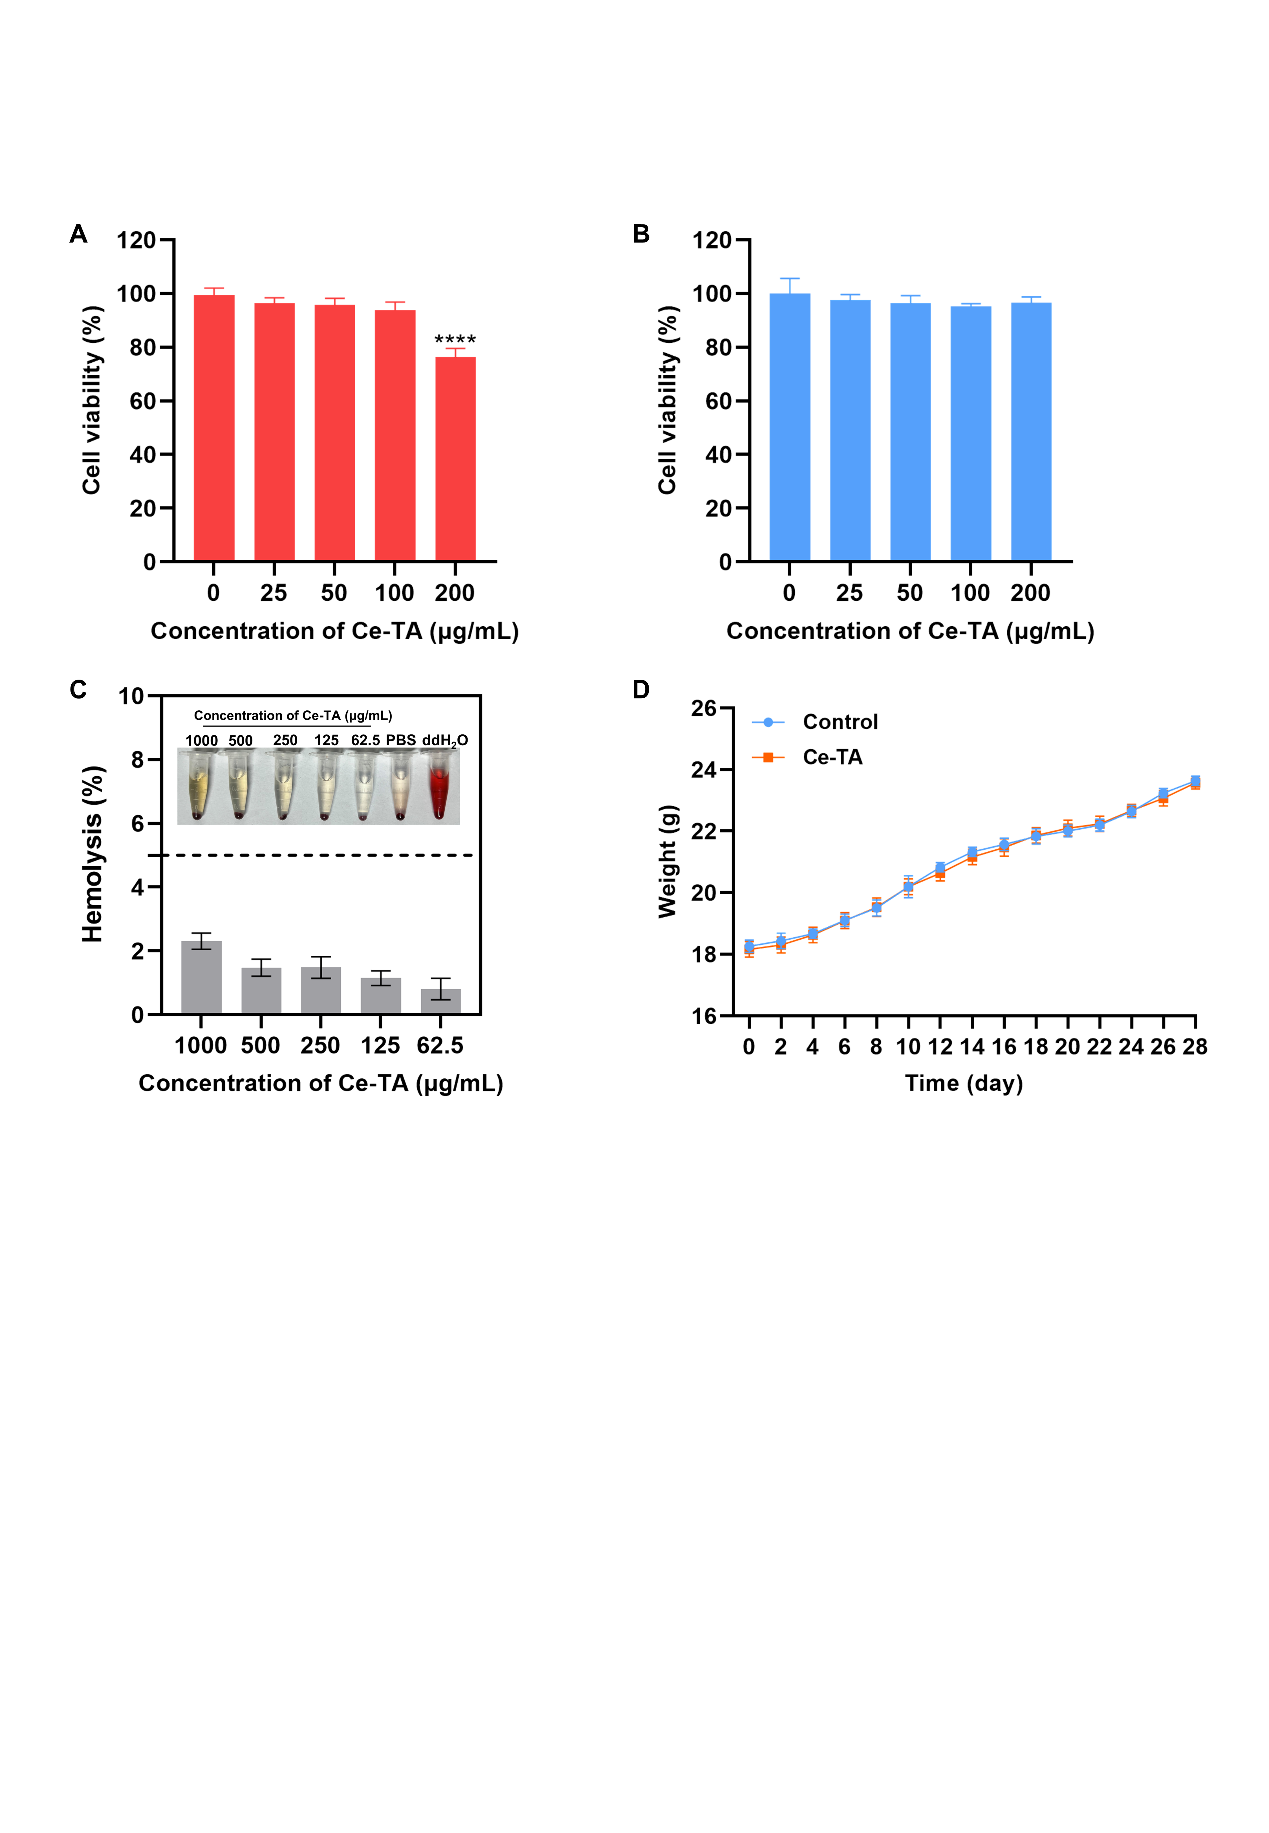
 Figure S2.** Safety assessment of Ce-TA. Cell viability of (A) BEAS-2B cellsand (B) HUVECs incubated with different concentrations of Ce-TA. (C) Hemolysis rate of red blood cells in mice under different concentrations of Ce-TA. (D) Weight of mice in different groups over 28 d. Data are presented as means ± SD (n = 3 per group). *****p* < 0.0001 (compared with 0 μg/mL group).

**
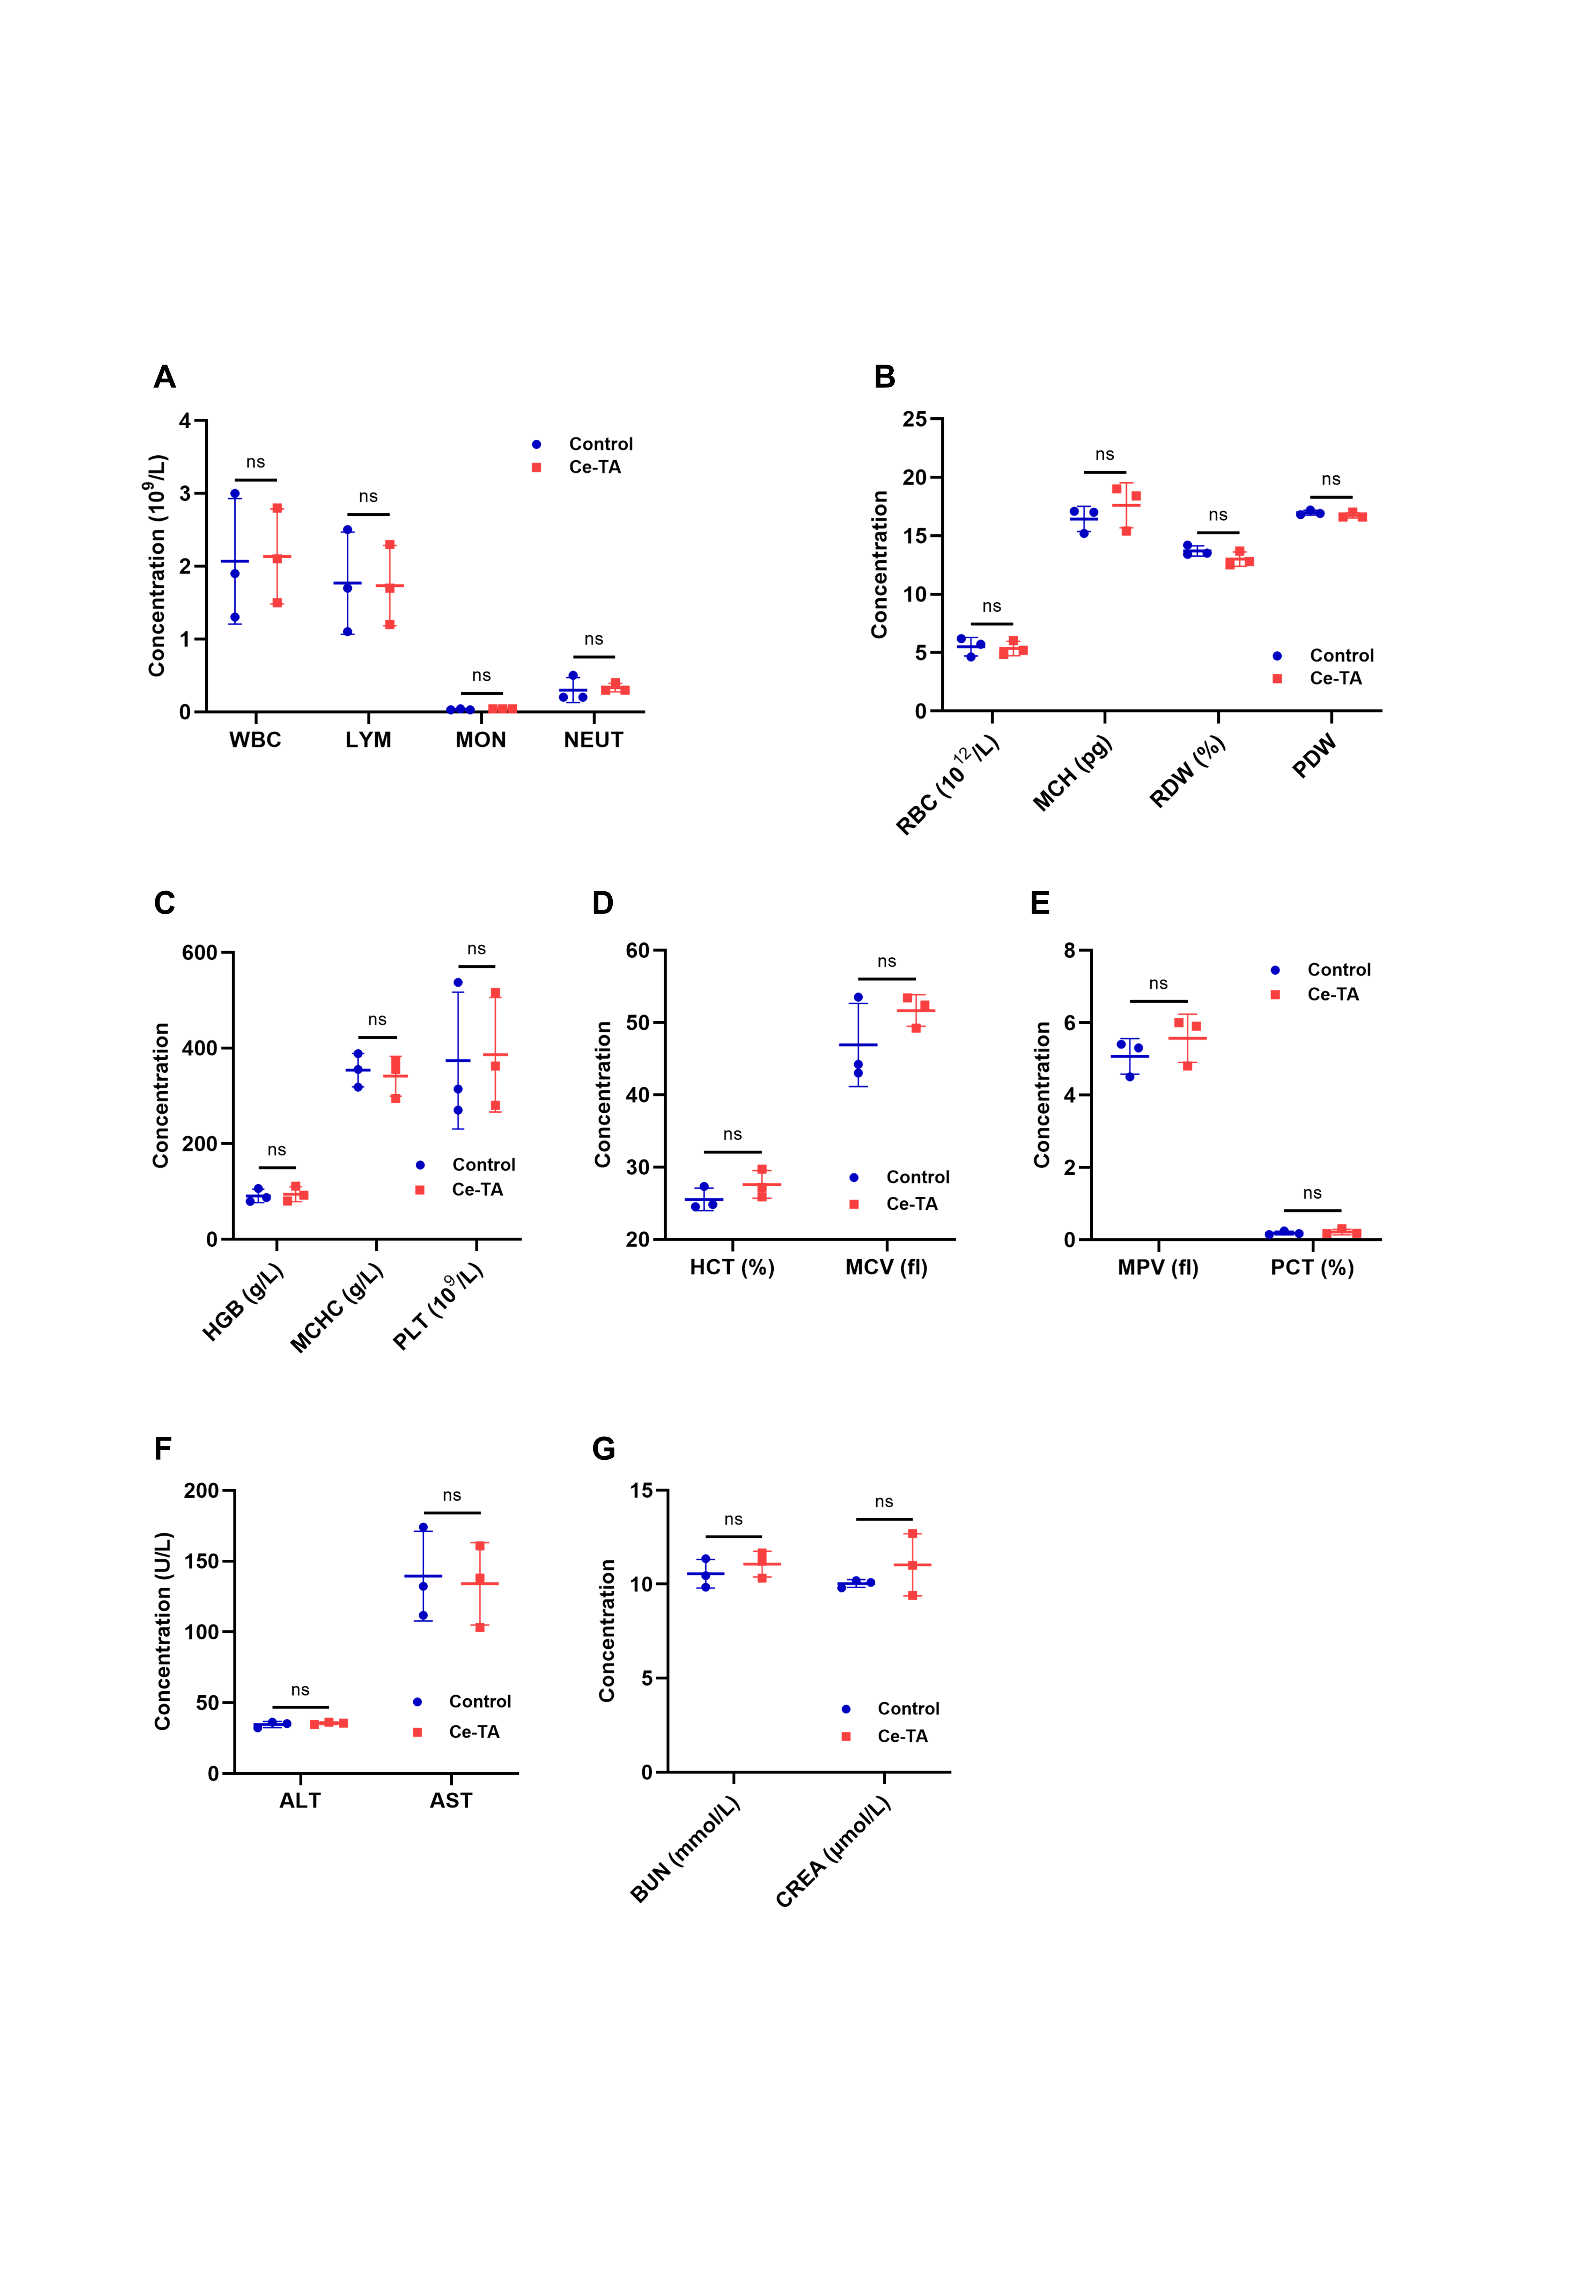
**

**Figure S3.** Safety assessment of Ce-TA in healthy mice at 1 d. (A-E)Blood parameters of mice in different groups. (F) Serum levels of ALT and AST of mice in different groups. (G) Serum levels of BUN and CREA of mice in different groups. Data are presented as means ± SD (n = 3 per group). ns, no significant difference.

**
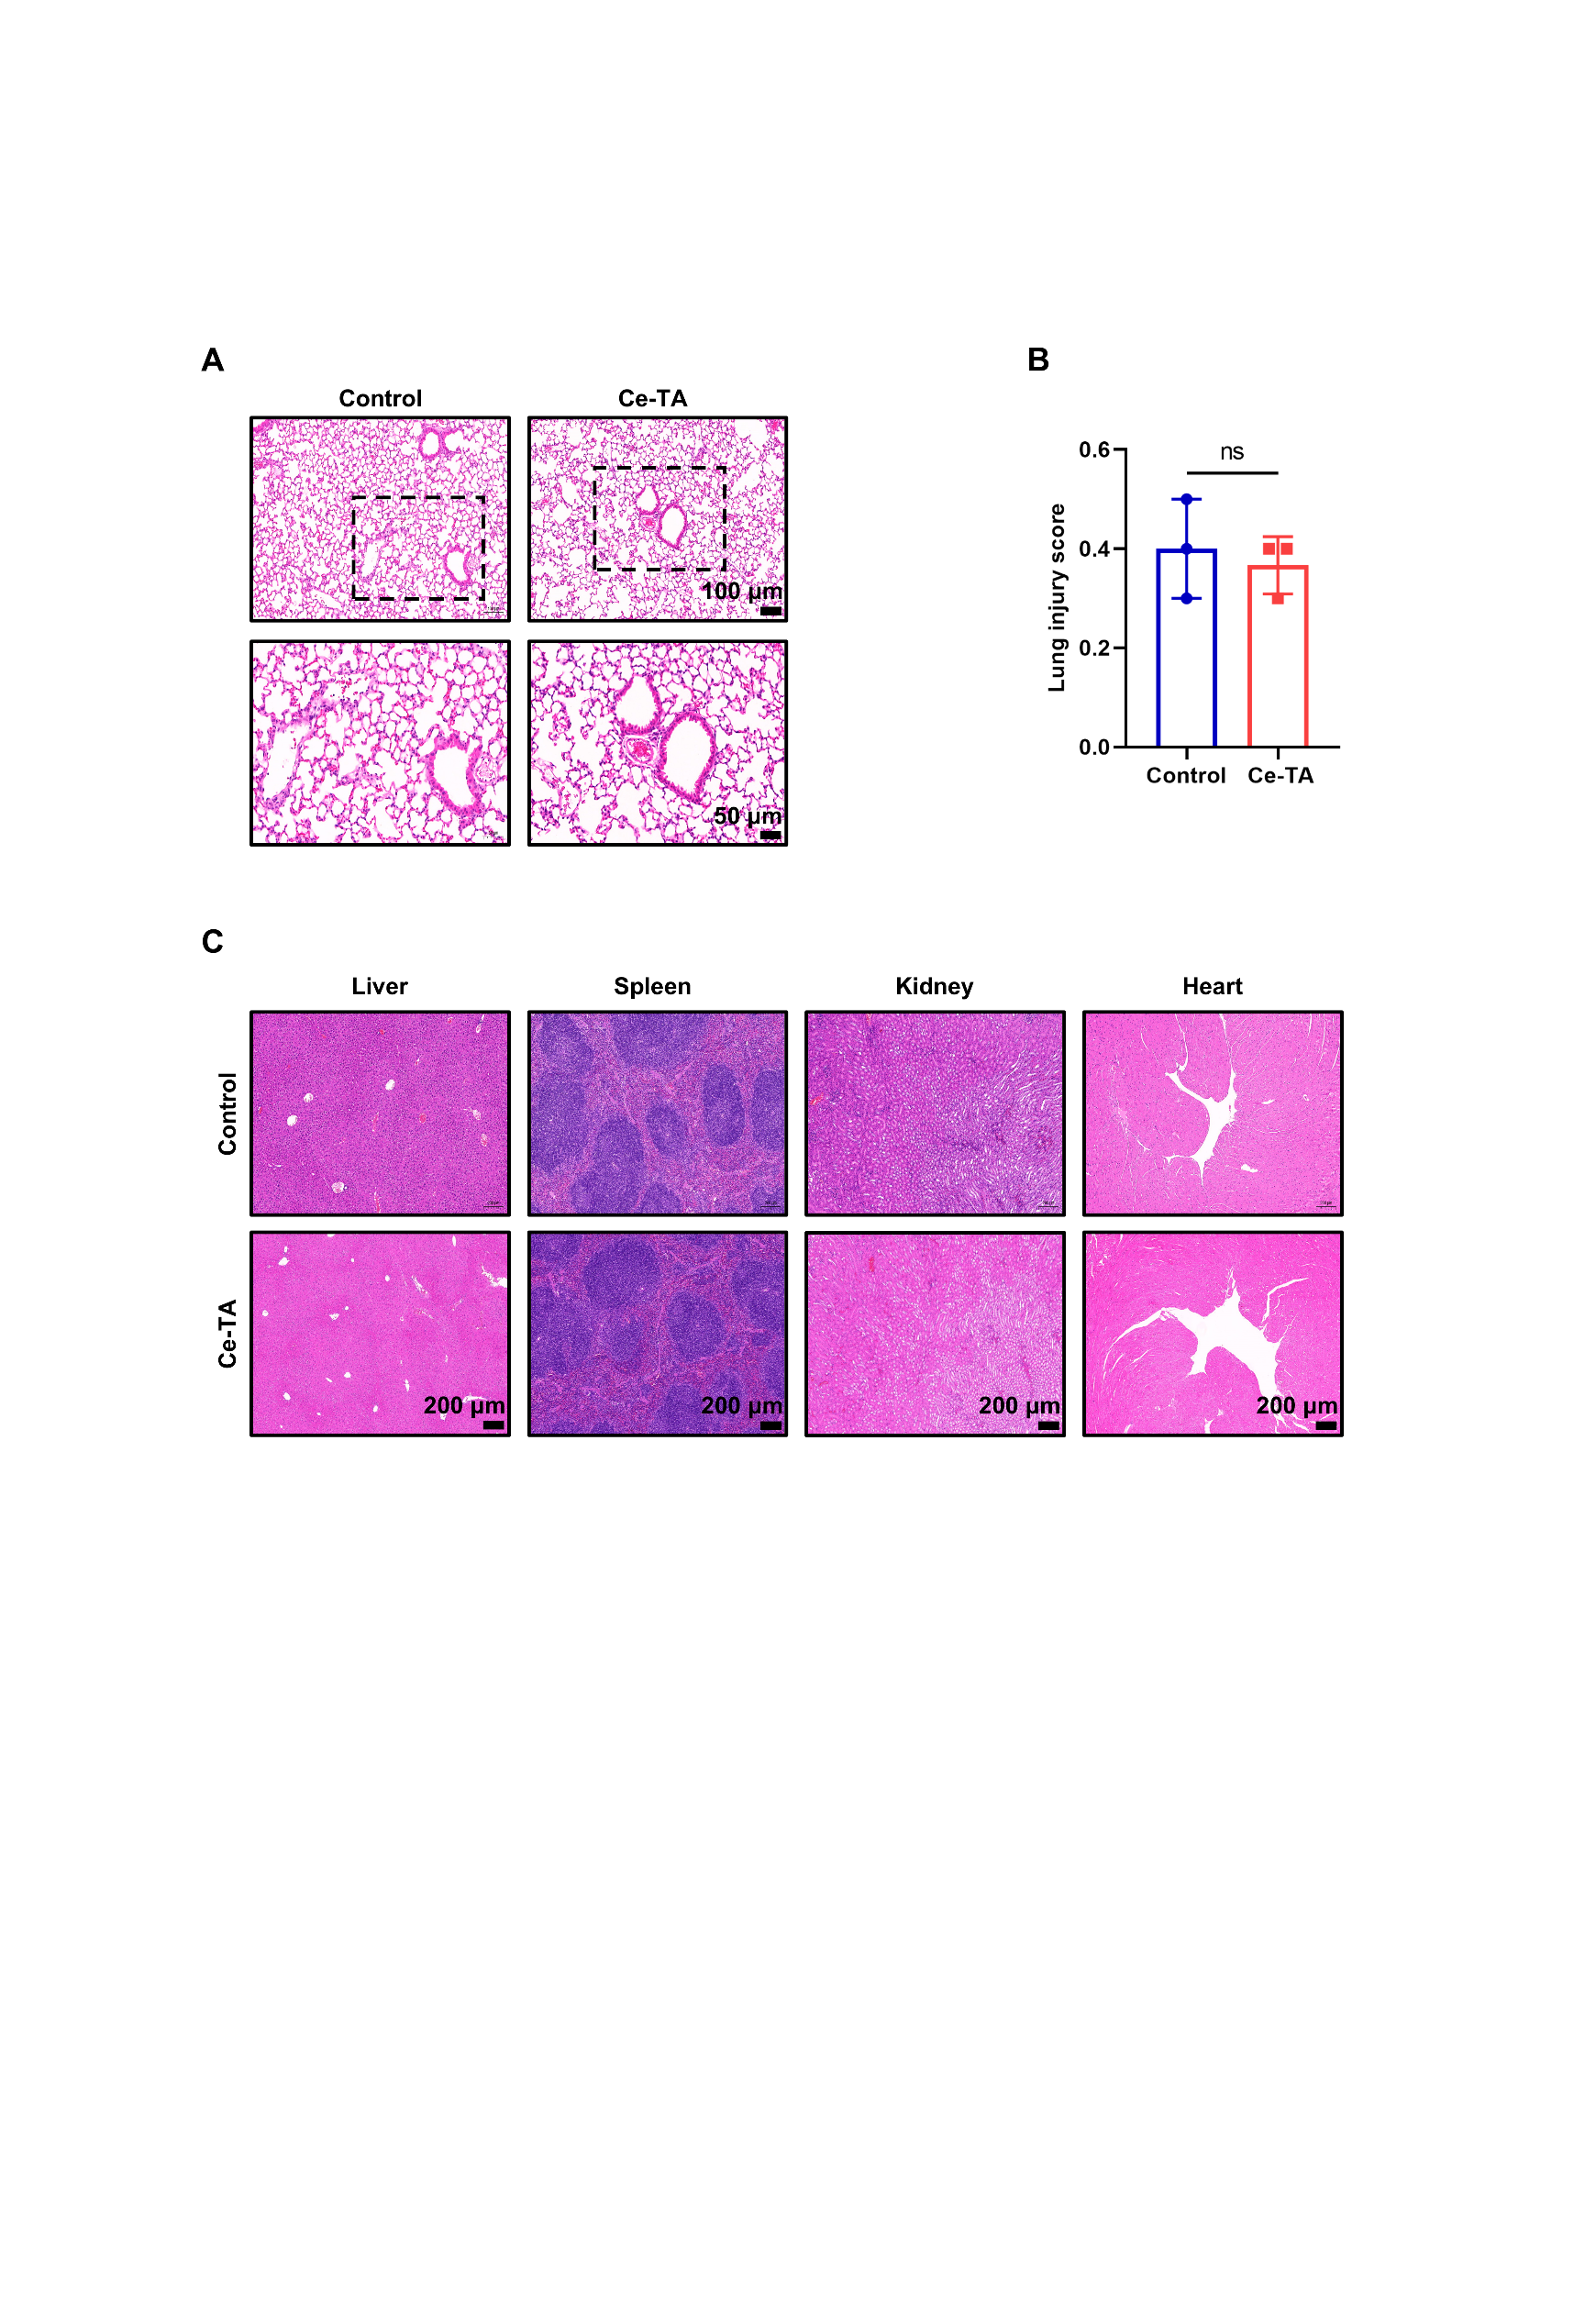
**

**Figure S4.** H&E staining sections of major organs to assess in vivo safety of Ce-TA in healthy mice at 1 d. (A) H&E staining sections of lung tissues of mice in different groups. The content within the dotted box is displayed below the corresponding image at twice its original size. (B) Lung injury scores calculated according to (A). (C) H&E staining sections of other major organs (liver, spleen, kidney, and heart) of mice in different groups. Data are presented as means ± SD (n = 3 per group). ns, no significant difference.

**
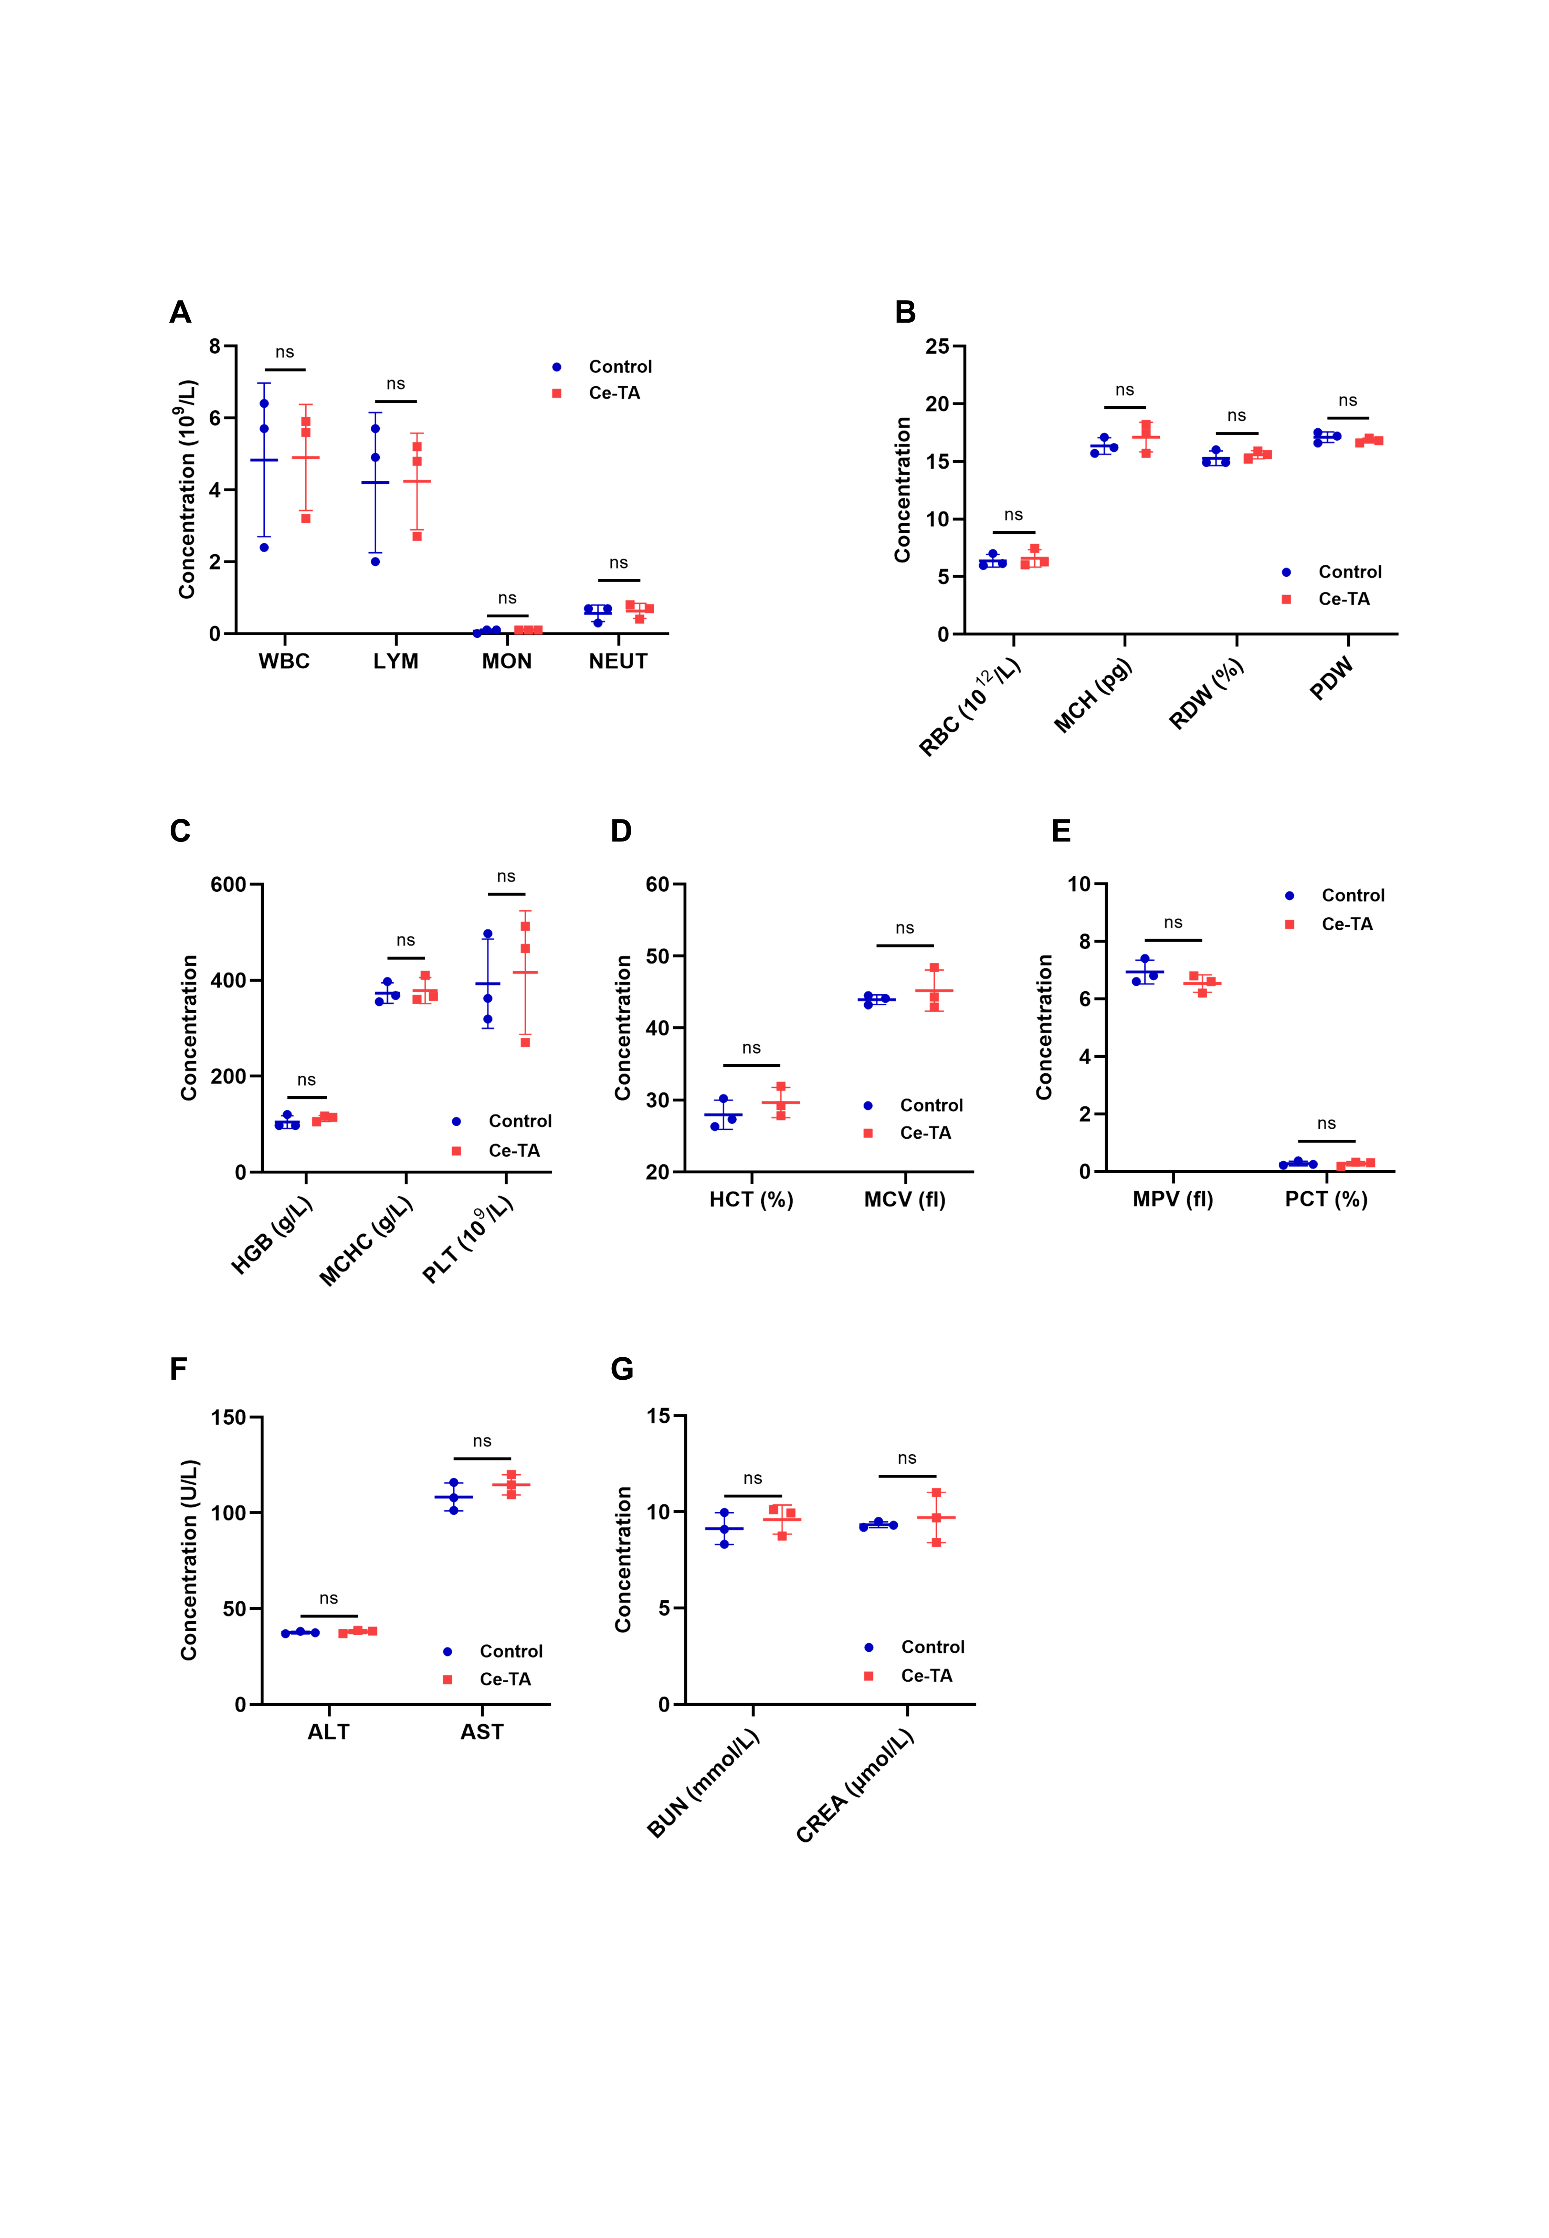
**

**Figure S5.** Safety assessment of Ce-TA in healthy mice at 7 d. (A-E)Blood parameters of mice in different groups. (F) Serum levels of ALT and AST of mice in different groups. (G) Serum levels of BUN and CREA of mice in different groups. Data are presented as means ± SD (n = 3 per group). ns, no significant difference.

**
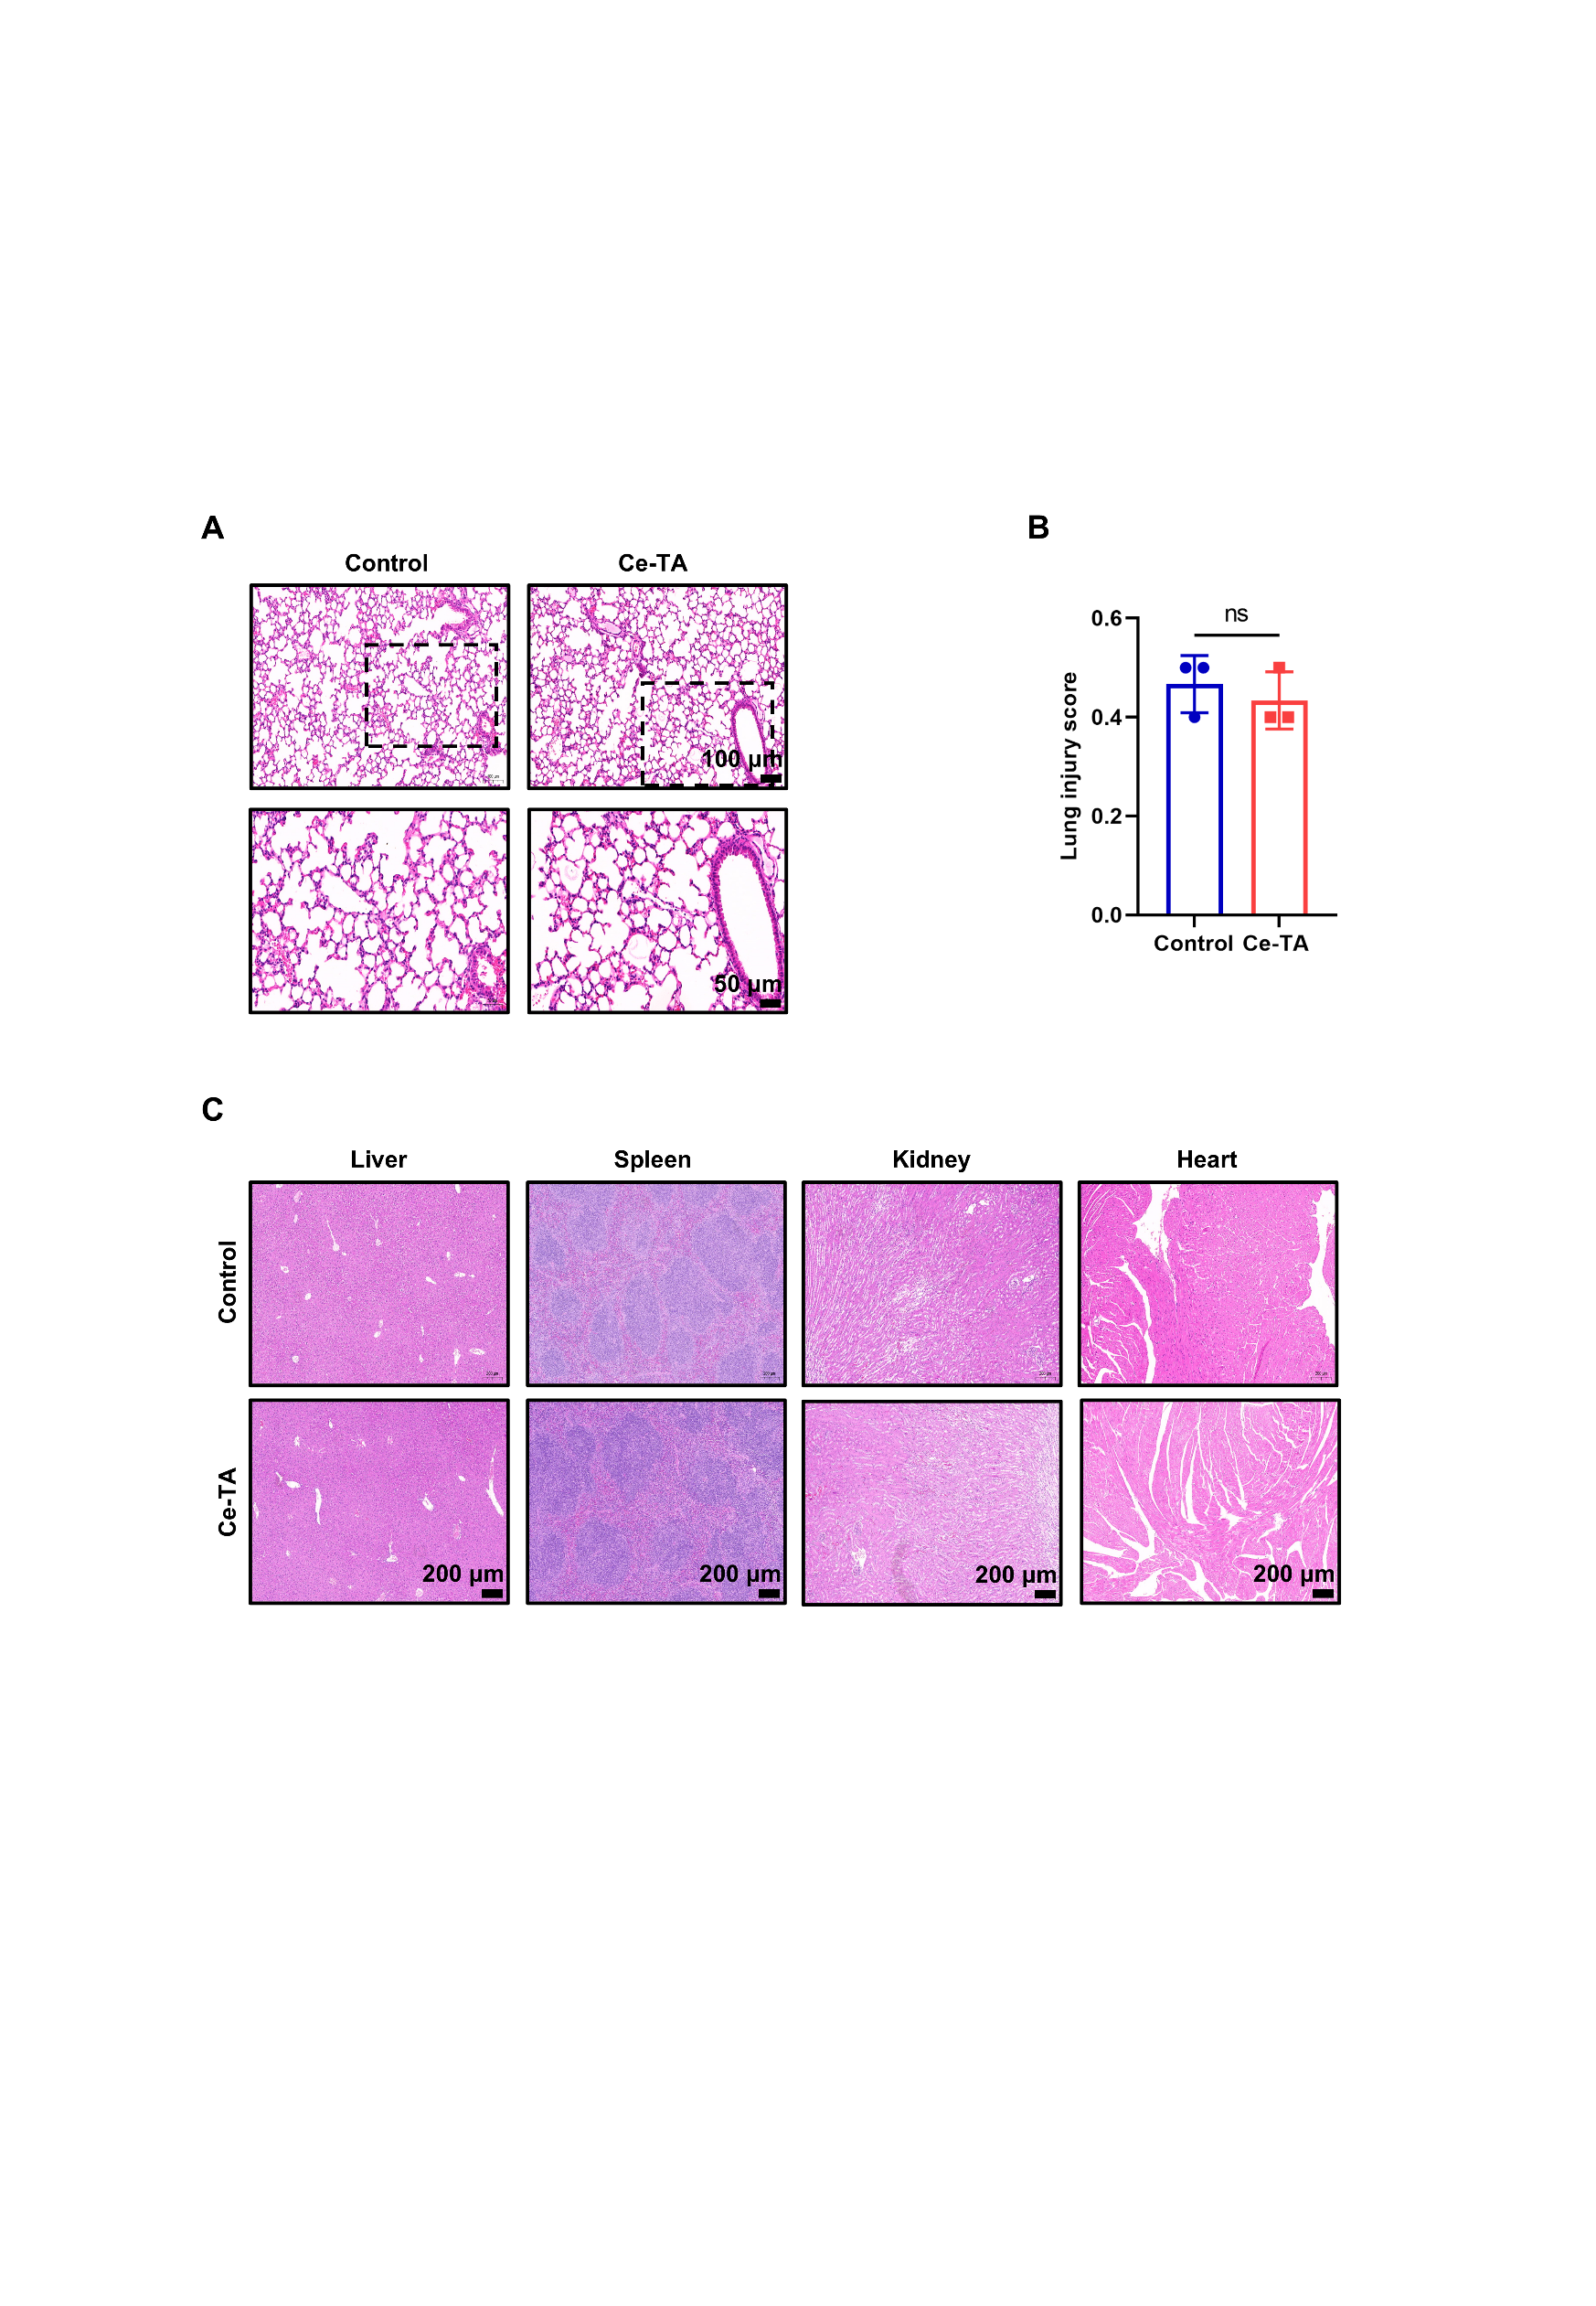
**

**Figure S6.** H&E staining sections of major organs to assess in vivo safety of Ce-TA in healthy mice at 7 d.(A) H&E staining sections of lung tissues of mice in different groups. The content within the dotted box is displayed below the corresponding image at twice its original size. (B) Lung injury scores calculated according to (A). (C) H&E staining sections of other major organs (liver, spleen, kidney, and heart) of mice in different groups. Data are presented as means ± SD (n = 3 per group). ns, no significant difference.

**
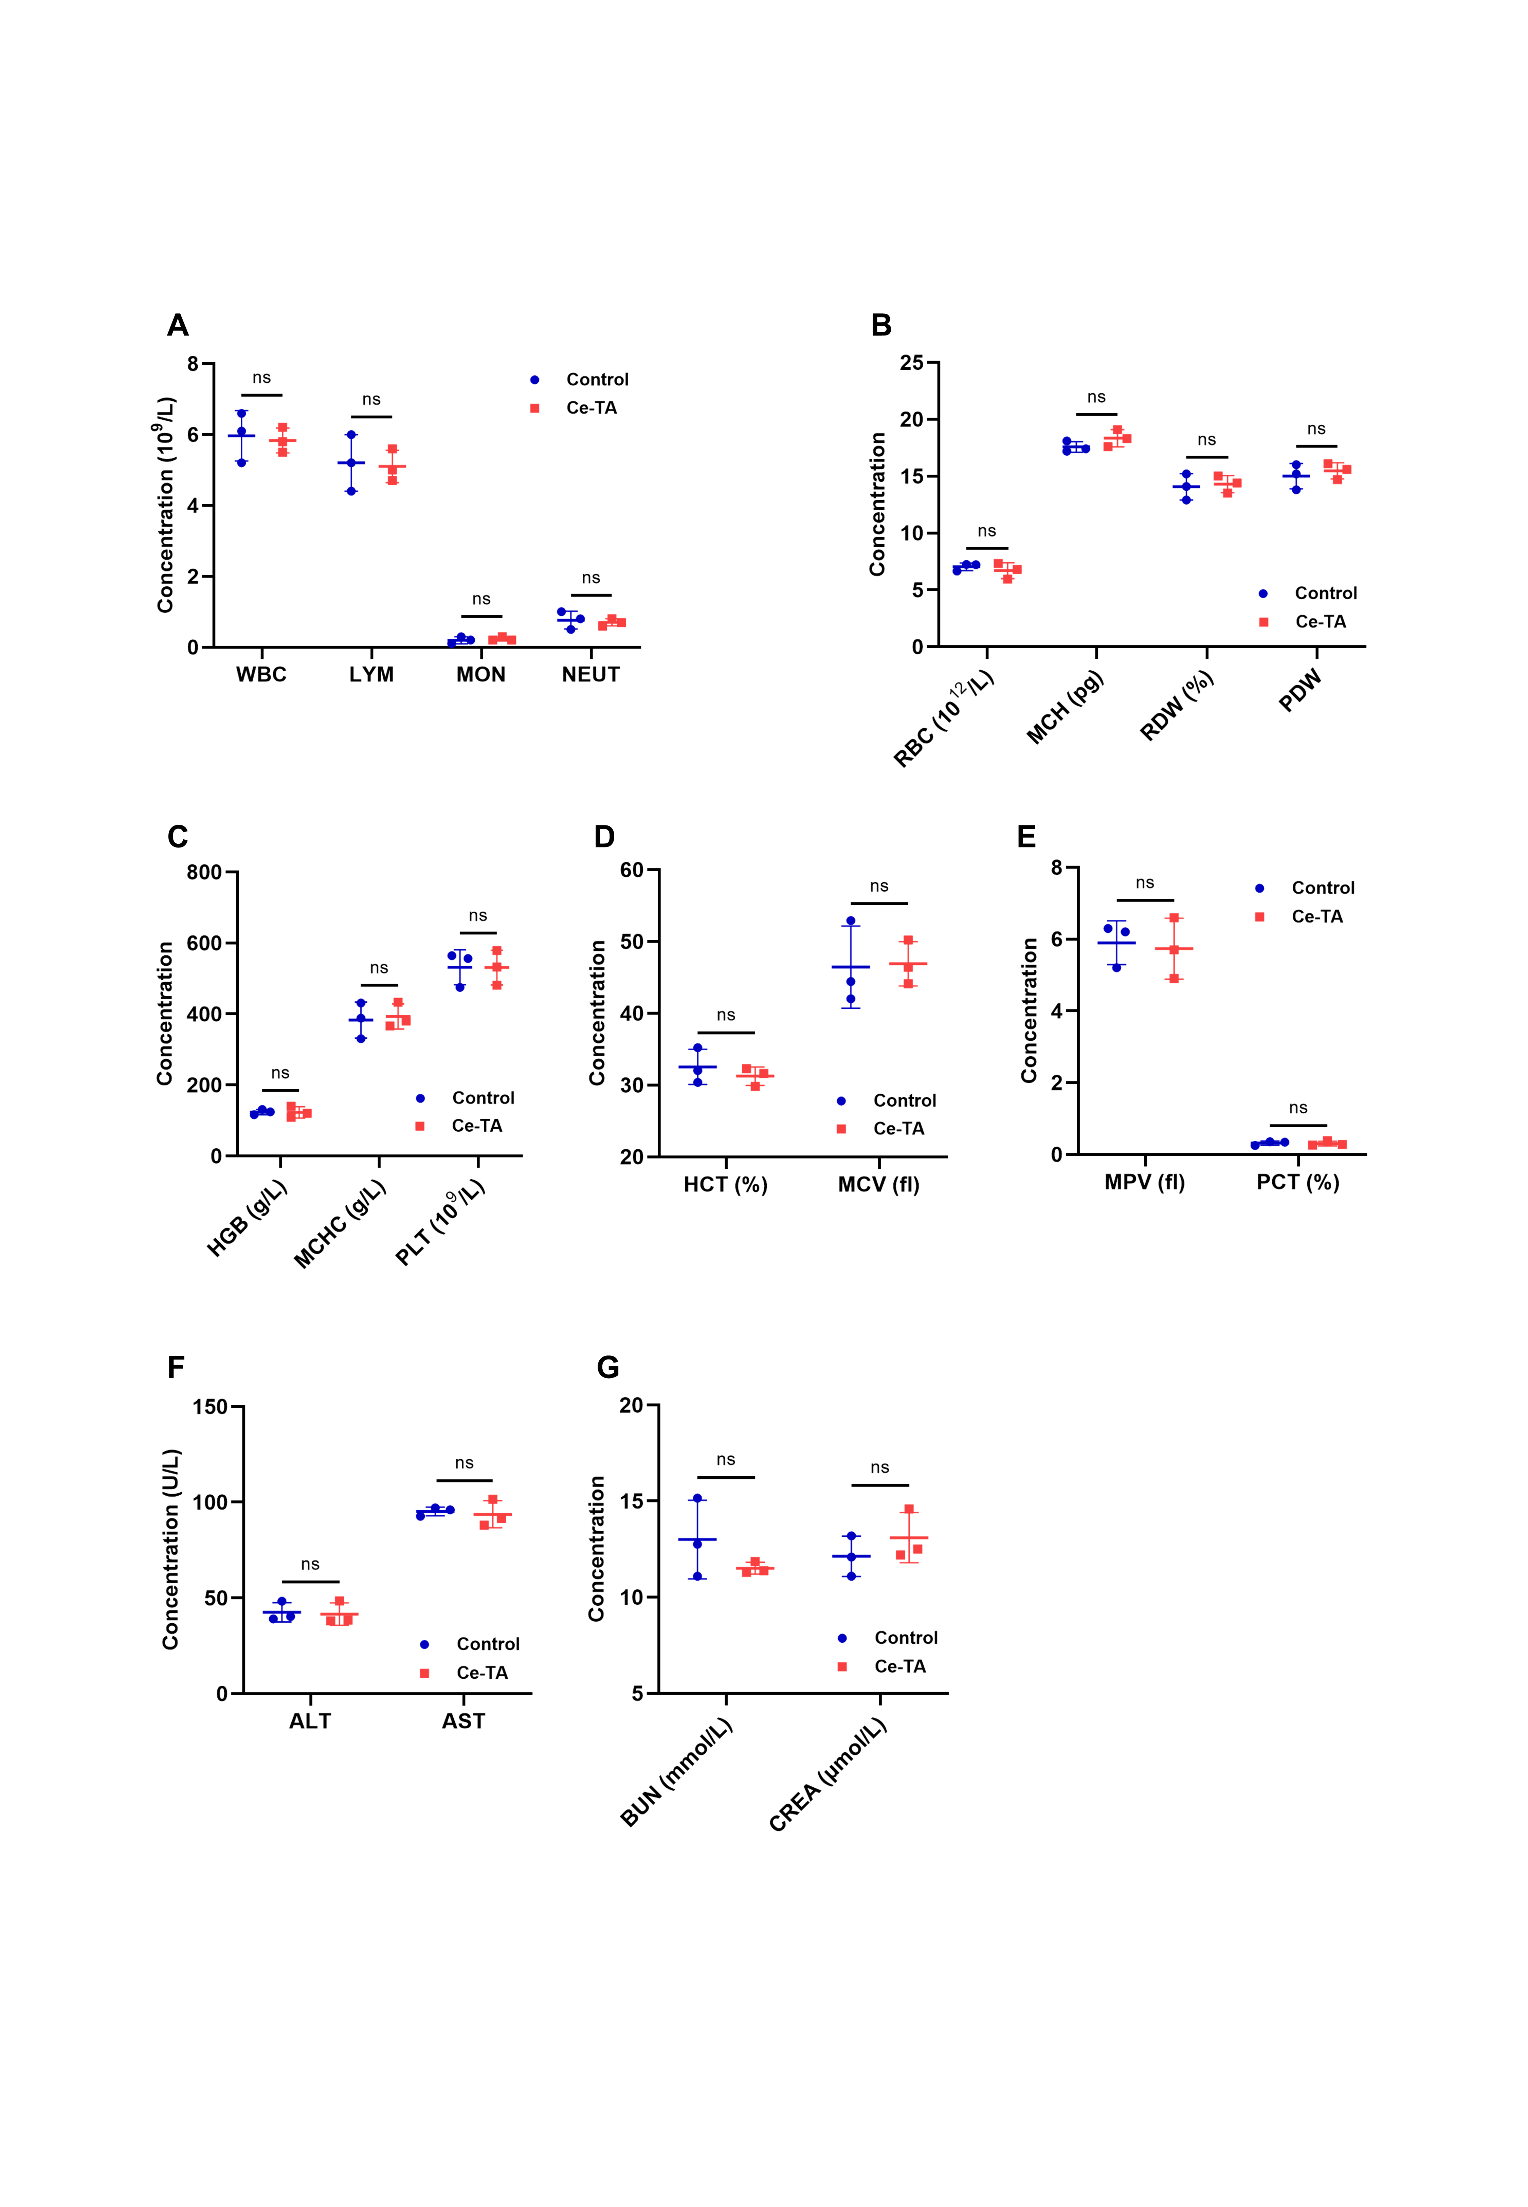
**

**Figure S7.** Safety assessment of Ce-TA in healthy mice at 14 d. (A-E) Blood parameters of mice in different groups.(F) Serum levels of ALT and AST of mice in different groups. (G) Serum levels of BUN and CREA of mice in different groups. Data are presented as means ± SD (n = 3 per group). ns, no significant difference.

**
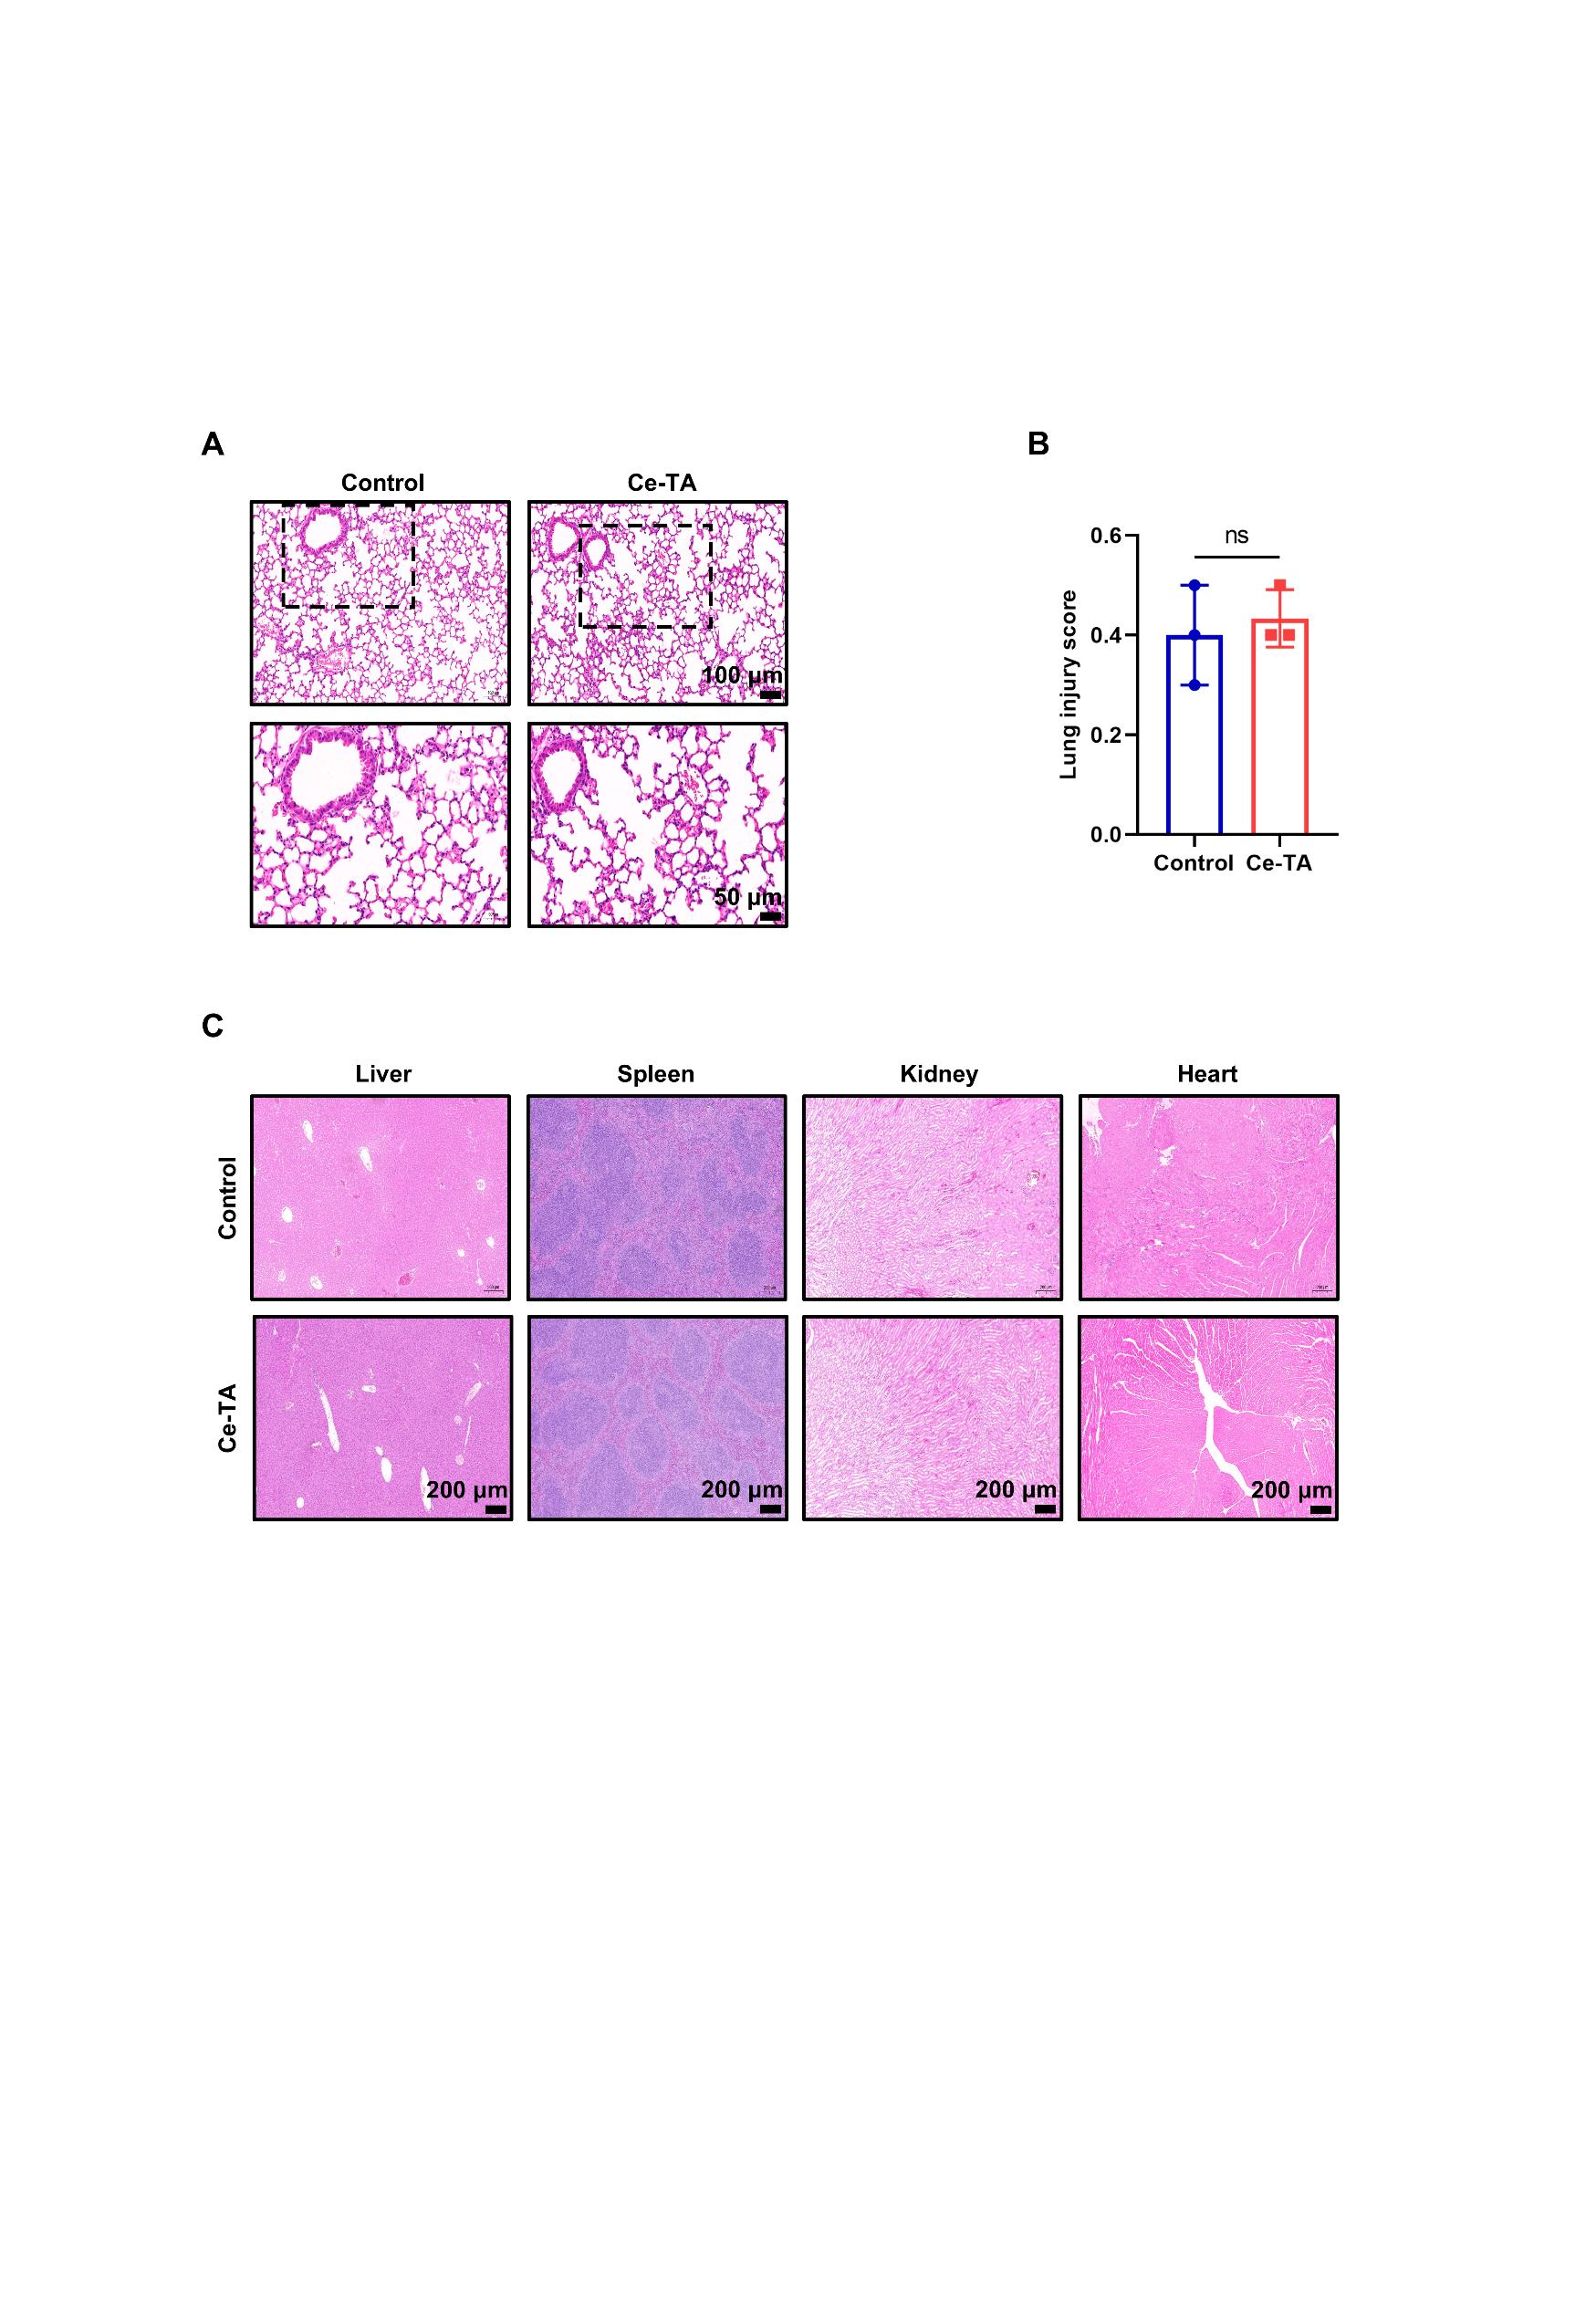
**

**Figure S8.** H&E staining sections of major organs to assess in vivo safety of Ce-TA in healthy mice at 14 d. (A) H&E staining sections of lung tissues of mice in different groups. The content within the dotted box is displayed below the corresponding image at twice its original size. (B) Lung injury scores calculated according to (A). (C) H&E staining sections of other major organs (liver, spleen, kidney, and heart) of mice in different groups. Data are presented as means ± SD (n = 3 per group). ns, no significant difference.

**
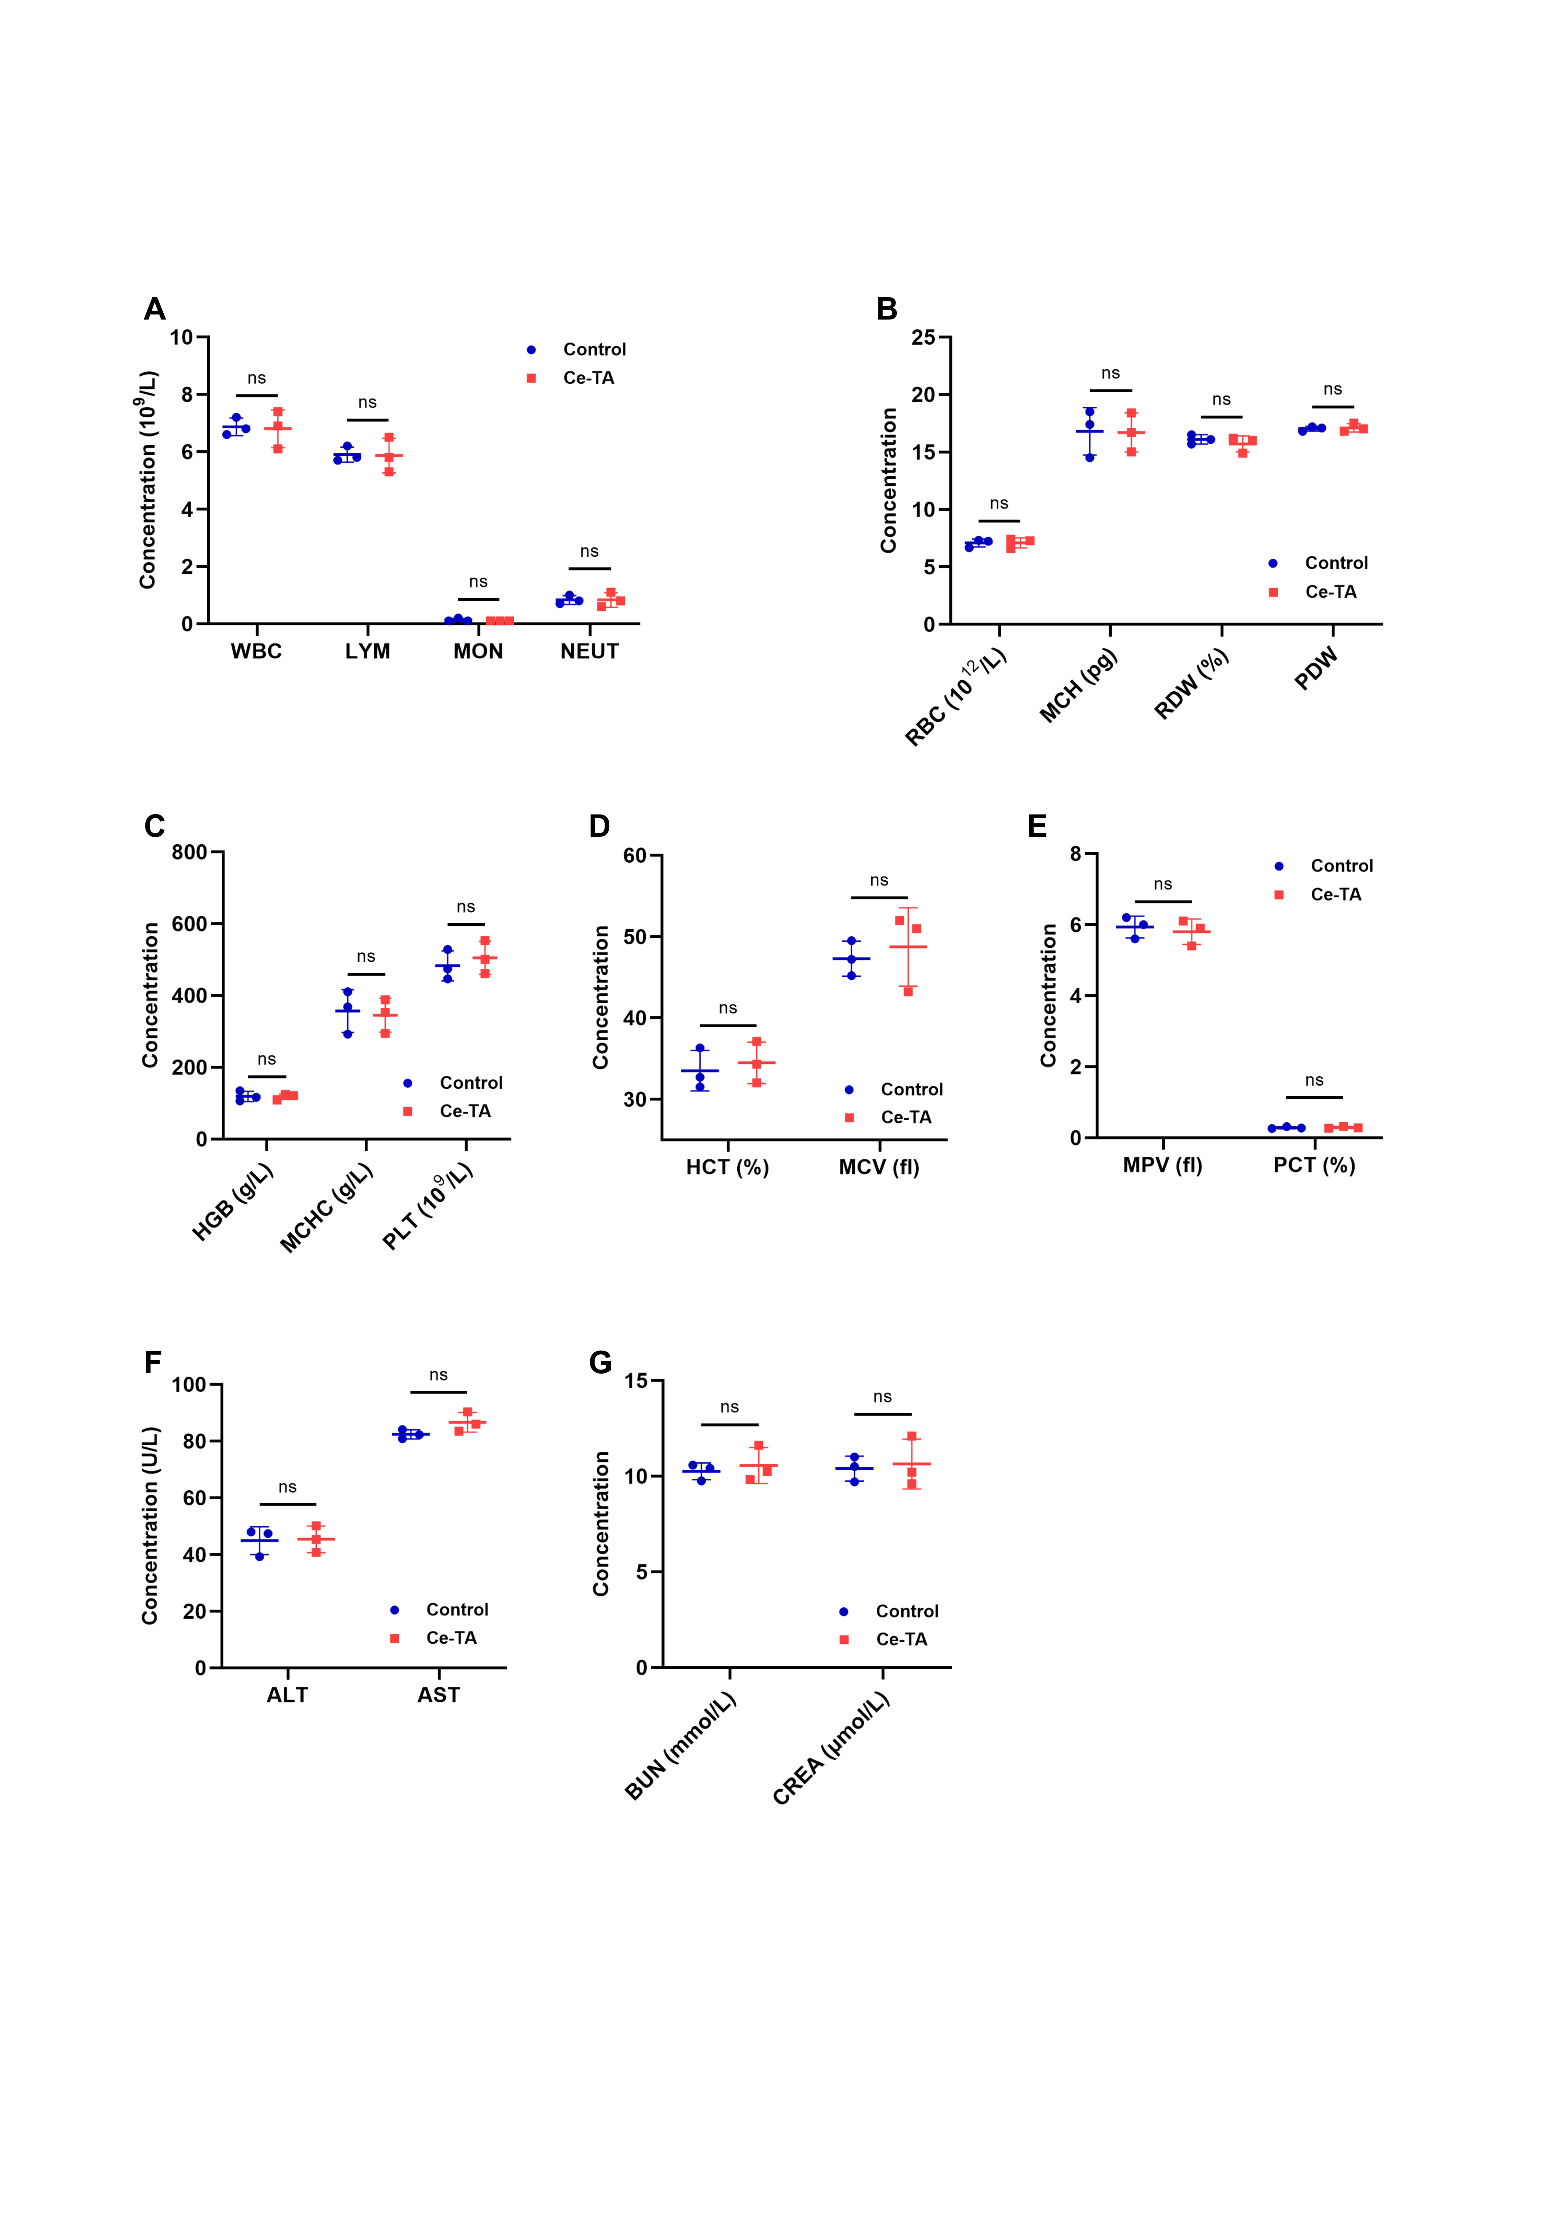
**

**Figure S9.** Safety assessment of Ce-TA in healthy mice at 28 d. (A-E) Blood parameters of mice in different groups. (F) Serum levels of ALT and AST of mice in different groups. (G) Serum levels of BUN and CREA of mice in different groups. Data are presented as means ± SD (n = 3 per group). ns, no significant difference.


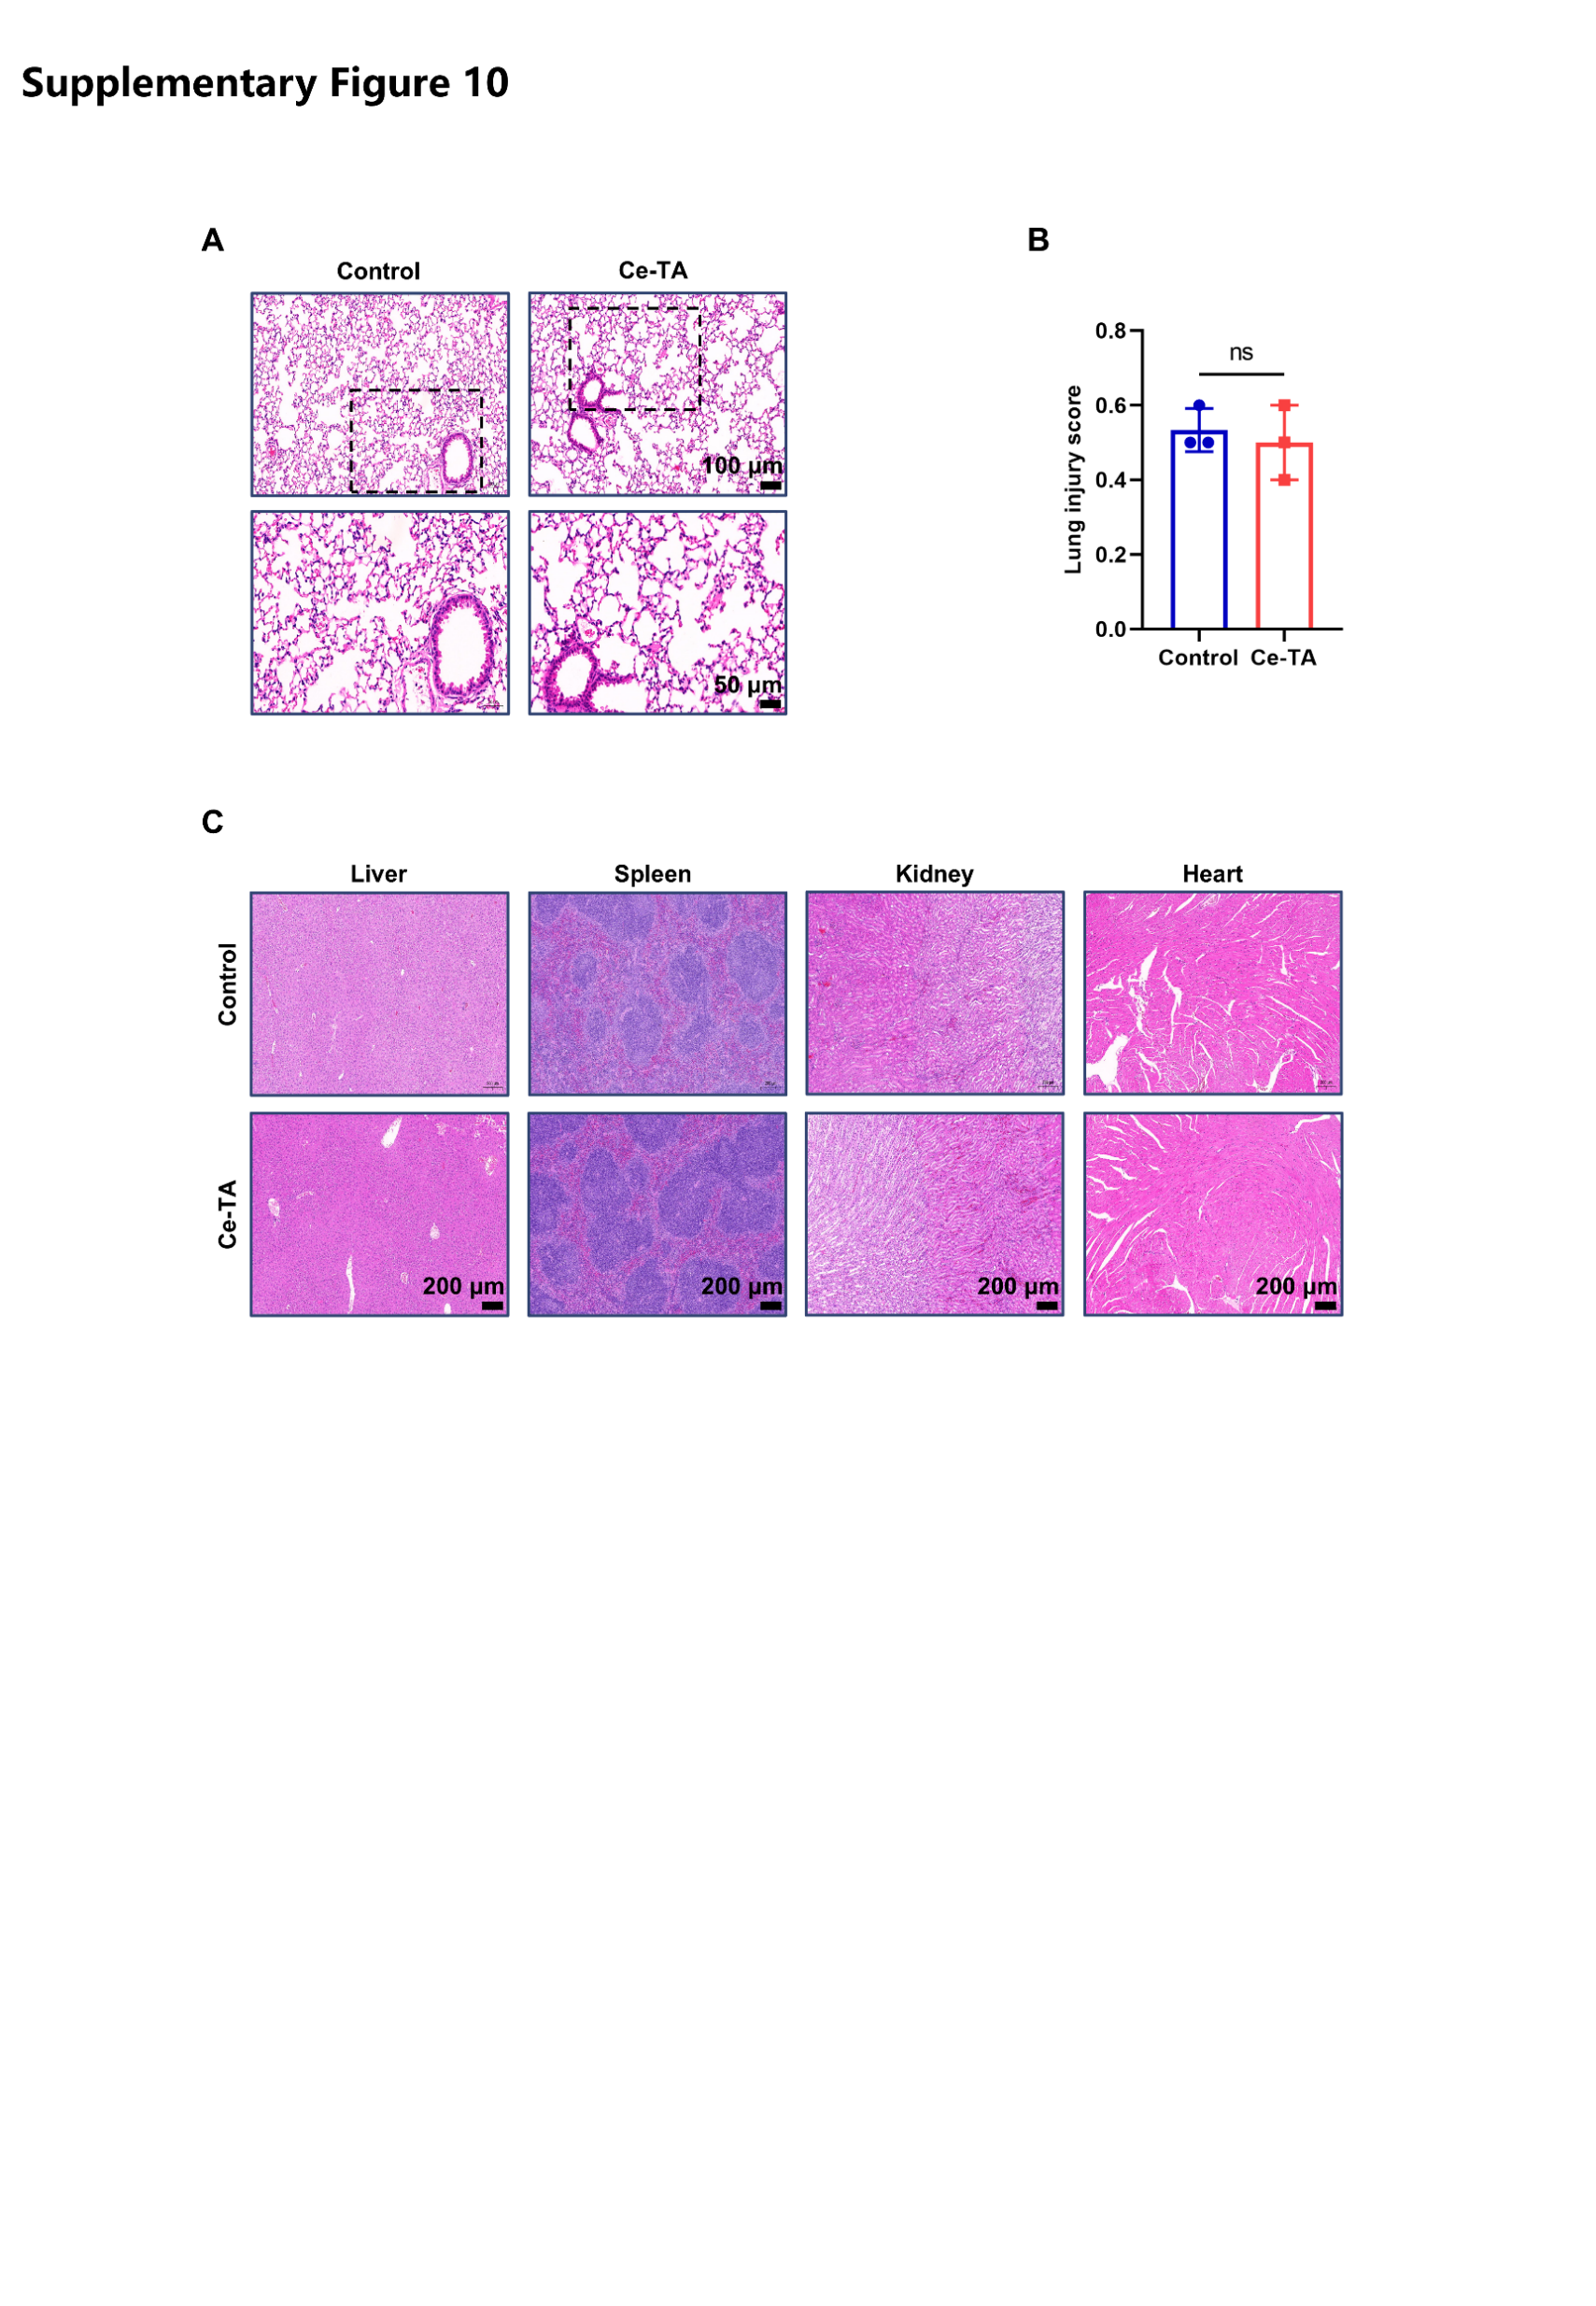


**Figure S10.** H&E staining sections of major organs to assess in vivo safety of Ce-TA in healthy mice at 28 d. (A) H&E staining sections of lung tissues of mice in different groups. The content within the dotted box is displayed below the corresponding image at twice its original size.(B) Lung injury scores calculated according to (A). (C) H&E staining sections of other major organs (liver, spleen, kidney, and heart) of mice in different groups. Data are presented as means ± SD (n = 3 per group). ns, no significant difference.
